# Supplementary material
Source: Springer Nature journal article supplement (https://www.springermedizin.de/resource/supplementary/12943_2010_719_MOESM11_ESM.pdf/9554652)
Supplement: MOESM11 [file 9554652]

**E**

HTet23p53      HTet26p53      HTet43GFP

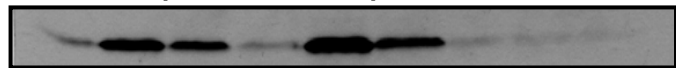

p53

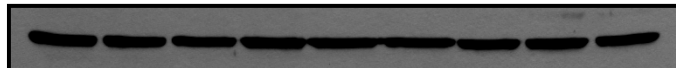

Cdk5

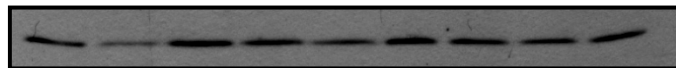

p35

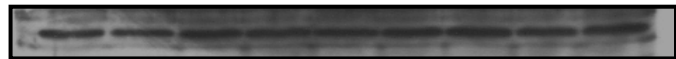 $\beta$ -Tubulin

|                     |   |   |   |   |   |   |   |   |   |
|---------------------|---|---|---|---|---|---|---|---|---|
| Dox (500 ng/ml)     | - | + | + | - | + | + | - | - | + |
| OA (5 nM)           | - | + | + | - | + | + | - | + | + |
| Cdk2/5 (10 $\mu$ M) | - | - | + | - | - | + | - | - | + |

**F**

HTet23p53

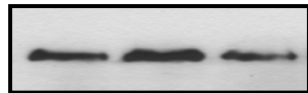

pCdk5

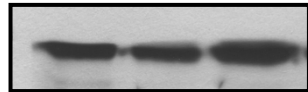

Cdk5

|                     |   |   |   |
|---------------------|---|---|---|
| Dox (500 ng/ml)     | - | + | + |
| OA (5 nM)           | - | + | + |
| Cdk2/5 (10 $\mu$ M) | - | - | + |
